# Supplementary material for: Trends of Sources of Clinical Research Funding from 1990 to 2020: A Meta-Epidemiological Study
Source: HighWire-hosted journal article supplement (doi:10.1136/jim-2021-002044), 2022-03-15

**Supplementary Figure 1.** Accumulated number of total funding's by year from 1990 to 2020.

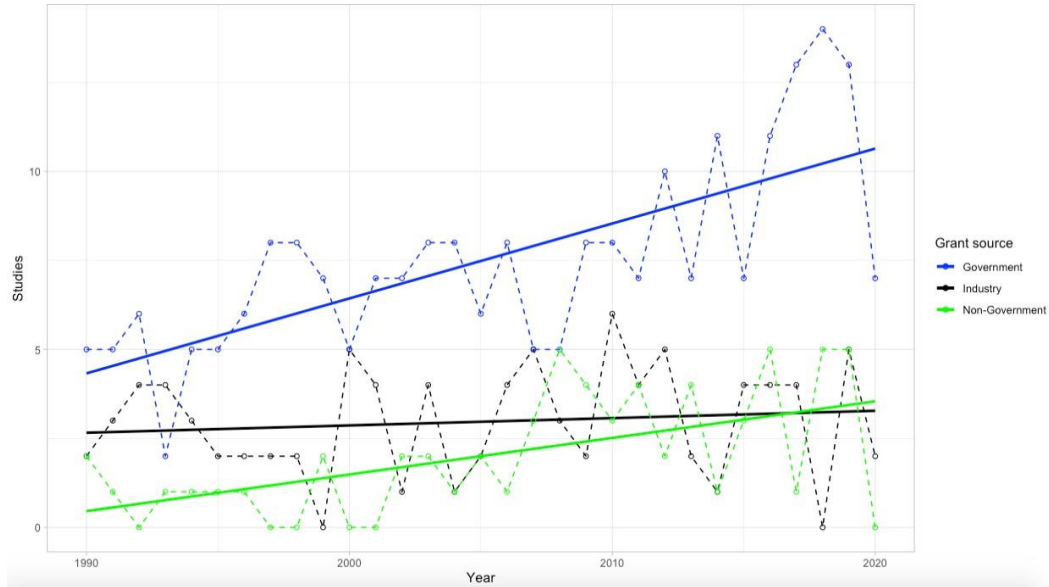

**Supplementary Figure 2.** Accumulated number of observational funding's by year from 1990 to 2020.

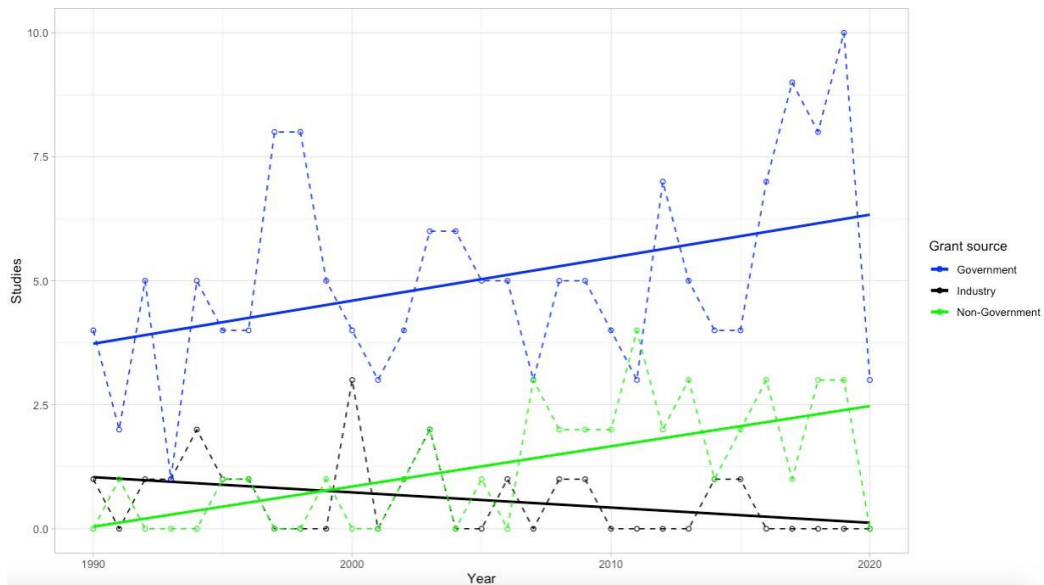

**Supplementary Figure 3.** Percentage of total experimental funding's by year from 1990 to 2020.

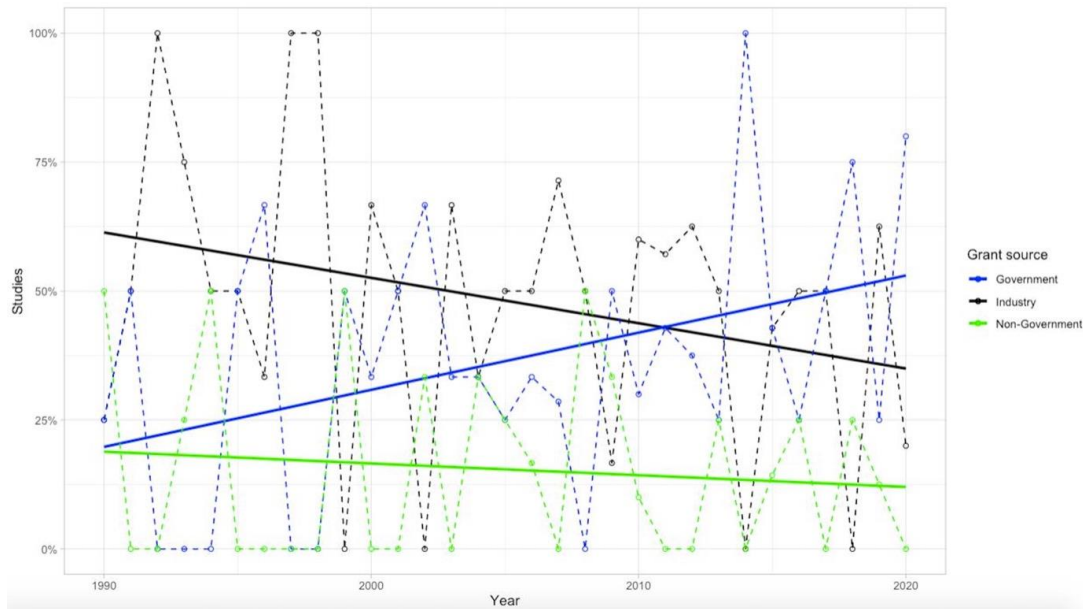

**Supplementary Figure 4.** Accumulated number of experimental funding's by year from 1990 to 2020.

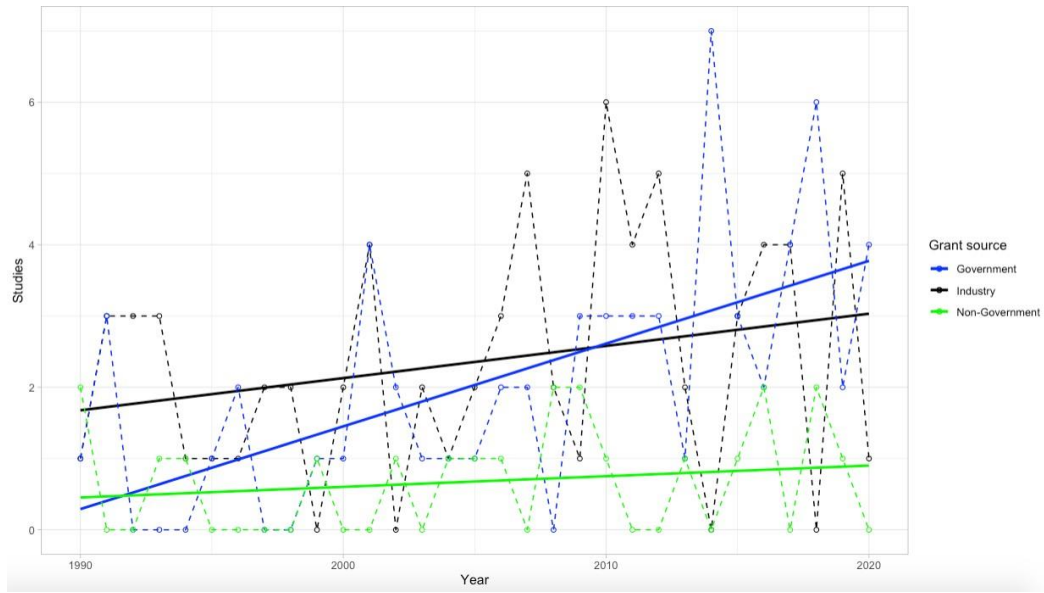

Supplement: jim-2021-002044supp001_data_supplement.pdf [file jim-2021-002044supp001_data_supplement.pdf]
